FROM INNOVATION TO APPLICATION

# A Mobile Platform Enables Unprecedented Sanitation Uptake in Zambia

Laurie Markle<sup>1</sup>, Abel Maganani<sup>2</sup>, Oswald Katooka<sup>2</sup>, Amy Tiwari<sup>1</sup>, Nicolas Osbert<sup>3</sup>, David A. Larsen<sup>1</sup>, Benjamin Winters<sup>1,4\*</sup>

**1** Akros, Inc., Lusaka, Zambia, **2** Ministry of Local Government and Housing, Lusaka, Zambia, **3** UNICEF Water and Sanitation unit, Lusaka, Zambia, **4** University of Montana School of Public and Community Health Sciences, Missoula, Montana, United States of America

\* [bwinters@akros.com](mailto:bwinters@akros.com)

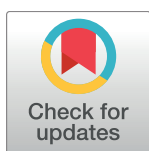

## OPEN ACCESS

**Citation:** Markle L, Maganani A, Katooka O, Tiwari A, Osbert N, Larsen DA, et al. (2017) A Mobile Platform Enables Unprecedented Sanitation Uptake in Zambia. *PLoS Negl Trop Dis* 11(1): e0005131. doi:10.1371/journal.pntd.0005131

**Editor:** Stephen Baker, Oxford University Clinical Research Unit, VIET NAM

**Published:** January 12, 2017

**Copyright:** © 2017 Markle et al. This is an open access article distributed under the terms of the [Creative Commons Attribution License](https://creativecommons.org/licenses/by/4.0/), which permits unrestricted use, distribution, and reproduction in any medium, provided the original author and source are credited.

**Funding:** UNICEF Zambia (<http://www.unicef.org/zambia/>) provided funding for the CLTS M2W implementation program, using a Partnership Cooperation Agreement (no reference number provided); however, no funding was provided for the analysis and write-up of the innovation piece. One of the authors, Nicolas Osbert, is an employee of UNICEF Zambia. The funders had no role in study design, data collection and analysis, decision to publish, or preparation of the manuscript.

**Competing Interests:** UNICEF Zambia (<http://www.unicef.org/zambia/>) provided funding for the CLTS M2W implementation program; however, no funding was provided for the analysis and write-up

## Overview

Today, diarrhea remains the world's second leading cause of death and is the leading cause of malnutrition and stunting in children under five. Many cases of diarrhea in developing countries can be prevented through access to sanitation and water. In fact, water, sanitation, and hygiene reduce diarrhea risk by an estimated 30%. When Kamal Kar published his first paper on Community-Led Total Sanitation (CLTS) in 2003, 43% of sub-Saharan Africa's rural population was practicing open defecation. Initially taking flight in Asia, the CLTS approach was a novel shift in sanitation and hygiene improvement interventions from providing individual, household latrine subsidies to propelling subsidy-free, community-driven behavior change. Kar argues that CLTS is effective due to its focus on demand creation. By illustrating the communal costs of open defecation (e.g., that one person's bad habits result in another person's bad health), the CLTS program affects a communal resolve, i.e., "demand," for change. Akros, in partnership with Zambia's Ministry of Local Government and Housing (MLGH) and UNICEF, layered a unique mobile-to-web application over traditional CLTS delivery methods, resulting in an innovative service delivery and monitoring system dubbed "CLTS M2W." CLTS M2W uses mobile phones, automated data feedback loops, and engagement of traditional leaders to provide communities with the ability to clearly see their progress towards sanitation goals. CLTS M2W paved the way for unprecedented CLTS uptake in Zambia, facilitating the creation of over 1,500,000 new users of sanitation in 18 months. In short, CLTS creates the demand, and CLTS M2W creates the critical transparency necessary to drive sustained behavior change.

## Challenge

Today, diarrhea remains the world's second leading cause of death and is the leading cause of malnutrition and stunting in children under five [1]. Many cases of diarrhea, and over 80% of diseases in developing countries, can be prevented through access to sanitation and water [2]. In fact, water, sanitation, and hygiene reduce diarrhea risk by an estimated 30% [3,4]. In addition to diarrhea, poor sanitation and hygiene have been shown to increase the prevalence of hookworm, *Trichuris trichiura*, *Entamoeba hartmanni*, *Endolimax nana*, and *Blastocystis hominis* infections [5]. When Kamal Kar published his first paper on Community-Led Total Sanitation (CLTS) in 2003 [6], 43% of sub-Saharan Africa's rural population was practicing open defecation. Initially taking flight in Asia, the CLTS approach was a novel shift in sanitation and hygiene improvement interventions from providing individual, household latrine subsidies to

of the innovation piece. One of the authors, Nicolas Osbert, is an employee of UNICEF Zambia.

propelling subsidy-free, community-driven behavior change. Kar argues that CLTS is effective due to its focus on demand creation [7]. By illustrating the communal costs of open defecation (e.g., that one person's bad habits result in another person's bad health), the CLTS program affects a communal resolve, i.e., "demand," for change. Akros, in partnership with Zambia's MLGH and UNICEF, layered a unique mobile-to-web application (M2W) over traditional CLTS delivery methods, resulting in an innovative service delivery and monitoring system dubbed "CLTS M2W" [8]. CLTS M2W uses mobile phones, automated data feedback loops, and engagement of traditional leaders to provide communities with the ability to clearly see their progress towards sanitation goals. CLTS M2W paved the way for unprecedented CLTS uptake in Zambia, facilitating the creation of over 1,500,000 new users of sanitation over 18 months. In short, CLTS creates the demand, and CLTS M2W creates the critical transparency necessary to drive sustained behavior change. See [Fig 1](#) below for a comparison of traditional CLTS and CLTS M2W reporting models.

### Community Level Feedback

Using District Health Information System 2 (DHIS2), a cloud-based data aggregation program, and a mobile-to-web surveillance protocol, feedback loops were designed to provide sustainable support and drive competition within the reporting hierarchy [8,9]. Village-level Sanitation Action Groups collect monthly household population, water access, and latrine adequacy data on paper forms. A volunteer Community Champion (CC) collects the paper forms from ten villages each month and submits a village-level aggregate report through a mobile phone via a Java-based application. Designed into the program are Short Message Service (SMS) reminders to CCs to submit monthly village-level sanitation reports, notifications of data validation errors, and notices of sanitation milestone achievements, which promote the sustainability of the M2W system. Reporting rates can be automatically transmitted to volunteer supervisors. District, provincial, and central government personnel receive real-time access to online dashboards providing quick overviews of performance within their constituency and among their peers, as well as monthly automated reports on performance, reporting rates, and data quality, which are circulated throughout the government. [Fig 2](#) below illustrates the CLTS M2W reporting and feedback schematic. This approach has not only driven a data feedback cycle, which improves data quality, but has also established a cost-effective, sustainable solution to CLTS monitoring and evaluation that requires minimal third party investment. According to an internal UNICEF estimate, across Zambia's non-M2W districts in 2014, the average cost per new sanitation user reached was US\$2.50; in M2W districts, new sanitation users were reached at an average unit cost of US\$1.65.

### Understanding Community Decision-Making

Of the feedback loops designed, the most transformative has been the empowerment of traditional leaders, the key agents of behavior change in rural Zambia. During chiefdom orientations on CLTS M2W, village headmen gather before their Chiefs and are provided the sanitation status of their village compared to neighboring villages. The collective chiefdom then commits to a deadline to claim Open Defecation Free (ODF) status, in which each household has a latrine that meets minimum adequacy standards. To continue to drive pressure following orientations, Chiefs receive tablets outfitted with a custom application. The visualizer application pulls real-time reports from DHIS2 to provide chiefdom-level performance data through maps, graphs, and charts in an easy-to-navigate, simple format. Providing Chiefs with data on village-level performance allows them to make judicious use of limited fuel and

**Gold Standard: Paper Trail**

- Manual data aggregation
- No feedback to communities
- No data transparency

**New Tool: CLTS M2W**

- Automated data aggregation
- Automated feedback to communities
- Clear, freely-shared data transparency among stakeholders

**Fig 1. Comparison of previous reporting pathway to new M2W platform.**

doi:10.1371/journal.pntd.0005131.g001

monitoring resources and continue to place pressure on CCs to submit reports. This and other salient benefits of CLTS M2W are noted in Fig 3 below.

The Chief's application, along with the other novel feedback loops, supports a culture of awareness and transparency: neighbors, superiors, and Chiefs are all witness to village-level and CC performance. This act of taking previously private activities (i.e., open defecation) and making them publicly known further motivates behavior change. The M2W protocol also

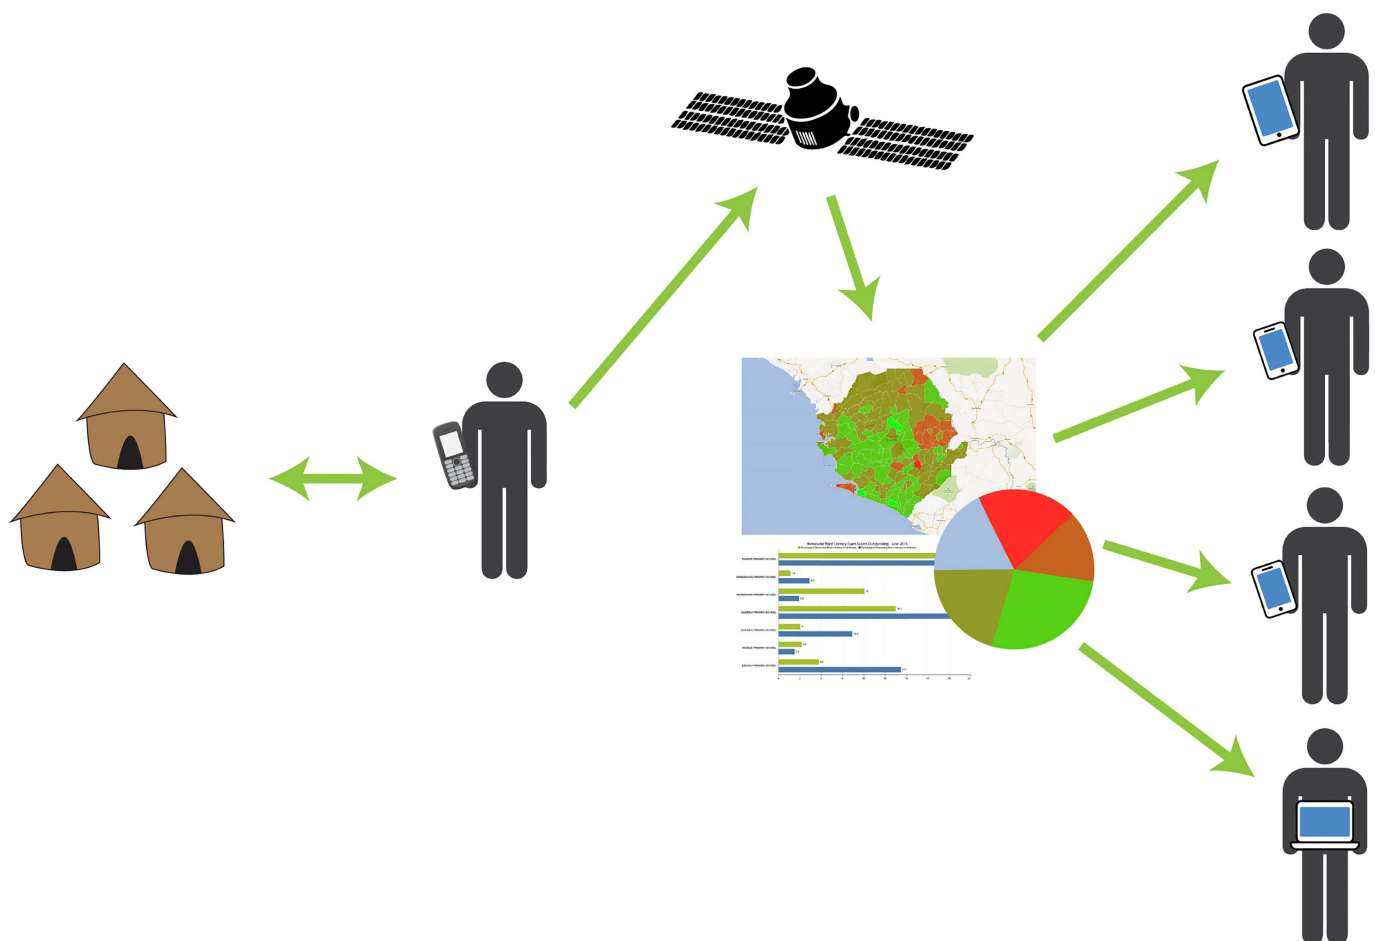

**Fig 2. Mobile-to-web reporting pathway.**

doi:10.1371/journal.pntd.0005131.g002

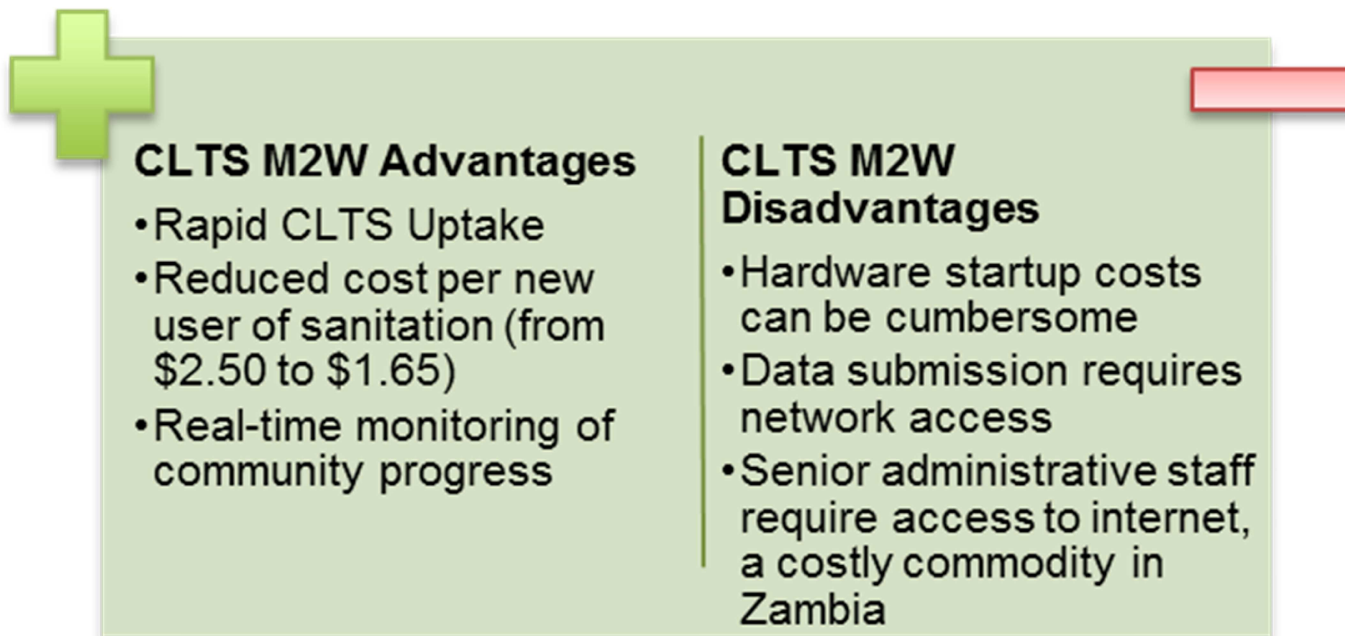

**Fig 3. Advantages and disadvantages of mobile-to-web CLTS.**

doi:10.1371/journal.pntd.0005131.g003

propels rapid reporting throughout administrative hierarchies among stakeholder ministries and, by backing a carefully selected set of indicators with evidence, provides decision-makers with the ability to make data-driven decisions. Together, this culture of awareness, interministerial accountability, and a set of robust data validation rules within DHIS2 enables a rapid, cost-effective, and sustainable means of data verification.

### Creating a Culture of Surveillance

Such verification procedures have become part and parcel of the CLTS program because of their effectiveness. For instance, through the technical support afforded by M2W, CLTS-implementing partners have been able to quickly address the dynamicity of the ODF status. For example, with the data provided in the M2W platform, MLGH was able to identify hand washing station coverage as the most challenging ODF component to attain in a community and, due to the requirements of water procurement, container quality, and access to soap, the most challenging to sustain. Armed with such knowledge, agents of community behavior change are able to target their interventions and activities through the same platform that is creating a culture of accountability amongst their communities. In this way, the CLTS M2W platform supports sustainability by enabling community buy-in, building capacity for critical thinking, and empowering leaders with real-time data, leading to improved intervention outcomes. A sample dashboard, facilitating access to this real-time data, is provided in [Fig 4](#) below.

### Way Forward

Escalation of the CLTS M2W platform is not without challenges. Building capacity among rural populations to engage technology and interpret data is time-consuming. Mobile phones require access to cell networks, senior administrators require costly internet access, and initial hardware expenses can be burdensome. Solving these challenges will require integration of the

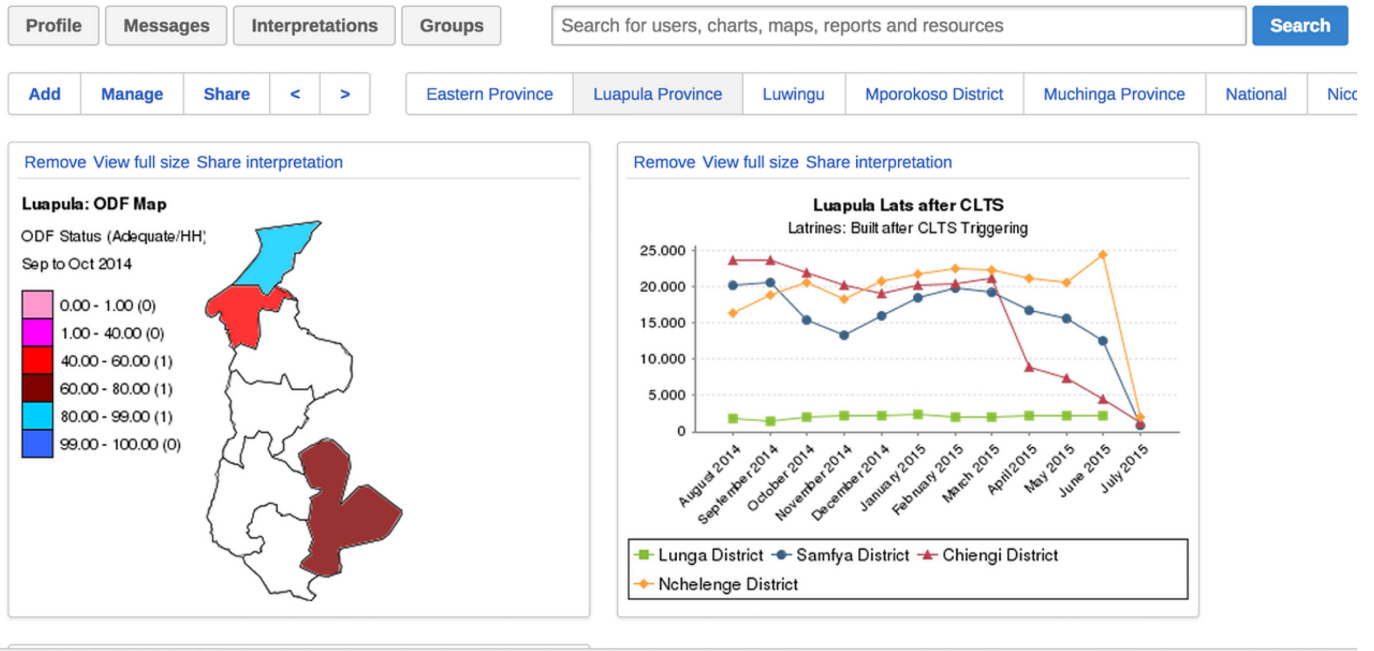

Fig 4. Sample provincial-level dashboard.

doi:10.1371/journal.pntd.0005131.g004

M2W platform across multiple sectors [10], but challenges integrating water and sanitation data with health indicator data (collected by the Ministry of Health) remain. Because health data, such as diarrhea prevalence, is the mandate of the Ministry of Health and rural water and sanitation data the mandate of MLGH, there's limited political will to ensure that health outcomes are measured as part of the routine reporting protocol. Additional studies across countries to ensure that the success of Zambia's M2W CLTS program is not unique are required.

M2W CLTS is currently operating across 49 of Zambia's 76 rural districts. Over the next year, M2W CLTS will be scaled up to include 100% of Zambia's rural districts, will incorporate School-Led Total Sanitation into the surveillance platform, and will expand to include monitoring of water access and facial cleanliness with the aim of better targeting trachoma prevention efforts. The M2W component has strengthened the revolutionary CLTS approach by providing real-time monitoring and feedback and reinforcing the drive toward ODF status.

## References

- Black RE, Cousens S, Johnson HL, Lawn JE, Rudan I, Bassani DG, et al. Global, regional, and national causes of child mortality in 2008: a systematic analysis. *Lancet*. Department of International Health, Johns Hopkins Bloomberg School of Public Health, Baltimore, MD 21205, USA. [rblack@jhsph.edu](mailto:rblack@jhsph.edu); Elsevier; 2010; 375: 1969–1987. Available: <http://eutils.ncbi.nlm.nih.gov/entrez/eutils/elink.fcgi?dbfrom=pubmed&id=20466419&retmode=ref&cmd=prlinks> doi: 10.1016/S0140-6736(10)60549-1 PMID: 20466419
- Jones G, Steketee RW, Black RE, Bhutta ZA, Morris SS, Group BCSS. How many child deaths can we prevent this year? *Lancet*. Division of Policy and Planning, United Nations Children's Fund, New York, NY 10017, USA.; Elsevier; 2003; 362: 65–71. Available: [http://www.sciencedirect.com/science?\\_ob=ArticleURL&\\_udi=B6T1B-4908YGT-10&\\_user=86449&\\_coverDate=07/05/2003&\\_rdoc=1&\\_fmt=high&\\_orig=gateway&\\_origin=gateway&\\_sort=d&\\_docanchor=&view=c&\\_acct=C000006858&\\_version=1&\\_urlVersion=0&\\_userid=86449&md5=6fae26ee](http://www.sciencedirect.com/science?_ob=ArticleURL&_udi=B6T1B-4908YGT-10&_user=86449&_coverDate=07/05/2003&_rdoc=1&_fmt=high&_orig=gateway&_origin=gateway&_sort=d&_docanchor=&view=c&_acct=C000006858&_version=1&_urlVersion=0&_userid=86449&md5=6fae26ee) doi: 10.1016/S0140-6736(03)13811-1 PMID: 12853204
- Bhutta ZA, Ahmed T, Black RE, Cousens S, Dewey K, Giugliani E, et al. What works? Interventions for maternal and child undernutrition and survival. *Lancet*. Aga Khan University, Karachi, Pakistan.

zulficar.bhutta@aku.edu: Elsevier; 2008; 371: 417–440. Available: <http://eutils.ncbi.nlm.nih.gov/entrez/eutils/elink.fcgi?dbfrom=pubmed&id=18206226&retmode=ref&cmd=prlinks> doi: 10.1016/S0140-6736(07)61693-6 PMID: 18206226

4. Fewtrell L, Kaufmann RB, Kay D, Enanoria W, Haller L, Colford JM. Water, sanitation, and hygiene interventions to reduce diarrhoea in less developed countries: a systematic review and meta-analysis. *Lancet Infect Dis*. Centre for Research into Environment and Health, University of Wales, Aberystwyth, UK. [lorna@creh.demon.co.uk](mailto:lorna@creh.demon.co.uk) <[lorna@creh.demon.co.uk](mailto:lorna@creh.demon.co.uk)>: Elsevier Ltd; 2005; 5: 42–52. Available: <http://eutils.ncbi.nlm.nih.gov/entrez/eutils/elink.fcgi?dbfrom=pubmed&id=15620560&retmode=ref&cmd=prlinks> doi: 10.1016/S1473-3099(04)01253-8 PMID: 15620560
5. Schmidlin T, Hürlimann E, Silué KD, Yapi RB, Hounghbedji C, Kouadio BA, et al. Effects of Hygiene and Defecation Behavior on Helminths and Intestinal Protozoa Infections in Taabo, Côte d'Ivoire. Diemert DJ, editor. *PLoS ONE*. 2013; 8: e65722. Available: <http://dx.plos.org/10.1371/journal.pone.0065722.t006> doi: 10.1371/journal.pone.0065722 PMID: 23840358
6. Kar K. Subsidy or self-respect? Participatory total community sanitation in Bangladesh. *IDS Work Pap* 184. 2003;
7. Kar K. Practical guide to triggering community-led total sanitation (CLTS) [Internet]. Institute of Development Studies; 2005. [http://ocw.internet-institute.eu/courses/special-programs/sp-723-d-lab-disseminating-innovations-for-the-common-good-spring-2007/readings/total\\_sanitation.pdf](http://ocw.internet-institute.eu/courses/special-programs/sp-723-d-lab-disseminating-innovations-for-the-common-good-spring-2007/readings/total_sanitation.pdf)
8. Zimba R, Ngulube V, Lukama C, Manangi A, Tiwari A, Osbert N, et al. Chiengi District, Zambia Open Defecation Free after 1 Year of Community-Led Total Sanitation. *Am J Trop Med Hyg*. American Society of Tropical Medicine and Hygiene; 2016; 16–0210.
9. DHIS2 [Internet]. [www.dhis2.org](http://www.dhis2.org)
10. Kar K, Milward K. Digging in, Spreading out and Growing up: Introducing CLTS in Africa. *IDS Pract Pap*. Blackwell Publishing Ltd; 2011; 2011: 01–64.
